# Supplementary material for: Tuning alginate β-lactoglobulin complex coacervation by modulating pH and temperature
Source: Royal Society of Chemistry journal article supplement (doi:10.1039/d2sm01435a), 2023-01-01
Supplement: d2sm01435a1.pdf [file d2sm01435a1.pdf]

1 **Supplementary information**

2 **Tuning Alginate  $\beta$ -Lactoglobulin Complex**  
3 **Coacervation by Modulating pH and Temperature**

4 Mikkel Madsen,<sup>\*a</sup> Hossein Mohammad-Beigi,<sup>a</sup> Peter Westh,<sup>b</sup> Finn L. Aachmann,<sup>c</sup> and Birte  
5 Svensson<sup>a</sup>

6 <sup>a</sup> Enzyme and Protein Chemistry and <sup>b</sup> Interfacial Enzymology, Department of Biotechnology and  
7 Biomedicine, Technical University of Denmark, DK-2800 Kgs. Lyngby, Denmark.

8 <sup>c</sup> Norwegian Biopolymer Laboratory (NOBIPOL), Department of Biotechnology and Food Science,  
9 NTNU Norwegian University of Science and Technology, N-7491, Trondheim, Norway.

10 <sup>\*</sup>Corresponding author

11 **1. Methods**

12 **1.1 Confocal Microscopy**

13 Alginates were labelled with fluorescein and  $\beta$ -Lg was labelled with *Abberior* STAR RED. As  
14 both types of labelling target the interacting groups (carboxylate on alginate and lysine on  $\beta$ -  
15 Lg) labeling degree was kept at 1 (number of labels / molecule) for  $\beta$ -Lg and 5 for alginate.  
16 0.67  $\mu$ M labelled alginate (0.2–0.3 mg/mL) was mixed with 27  $\mu$ M (0.5 mg/mL) labelled  $\beta$ -Lg  
17 in 10 mM universal buffer (Brooke et al., 2015) pH 4.0, 75 mM NaCl and incubated at 25°C, 55  
18 or 95°C for 5 min. Samples were cooled and transferred to the microscope plate for imaging.  
19 Images were obtained using a total internal reflection fluorescence microscope (IX 83,  
20 Olympus, Tokyo, Japan) using a EMCCD camera (ImagEM X2, Hamamatsu, Hamamatsu City,  
21 Japan) and an oil immersion 100 $\times$  objective (UAPON 100XOTIRF, Olympus, Tokyo, Japan)  
22 equipped with the detectors and filter sets for monitoring of fluorescein fluorescence  
23 (excitation, 488 nm; emission, 517 nm) and *Abberior* STAR RED (excitation, 630 nm; emission,  
24 655 nm).

25 **2. Figures**

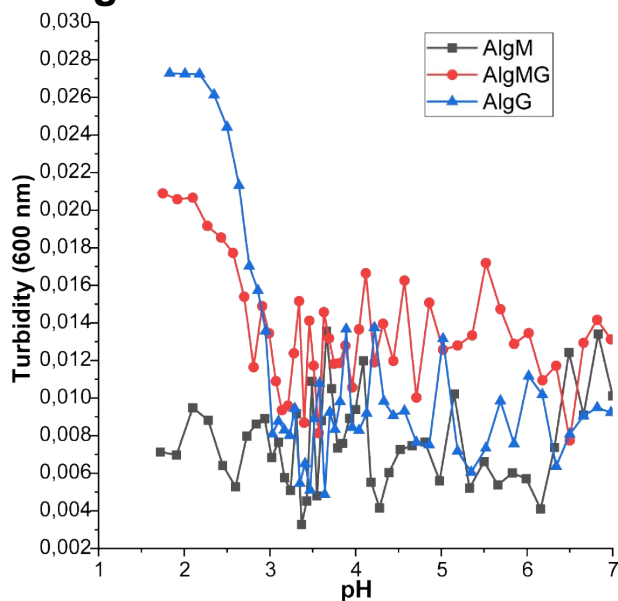

26

27 **Fig. S1.** Phase diagrams of 0.67  $\mu\text{M}$  alginates (0.2–0.3 mg/mL) followed by turbidity (left panel) as a  
 28 function of pH. AlgM  $\beta$ -Lg (black), AlgMG (red), AlgG (blue).

29

30 **Table S1.** Interaction parameters for alginate- $\beta$ -Lg complexation in bicine ( $\Delta H_{\text{ion}} = 11.4$  kJ/mol), citrate  
 31 ( $\Delta H_{\text{ion}} = 4.0$  kJ/mol), phosphate ( $\Delta H_{\text{ion}} = -8.0$  kJ/mol) at pH 2.65 and 20 mM oxalate ( $\Delta H_{\text{ion}} = -7.0$   
 32 kJ/mol), acetate ( $\Delta H_{\text{ion}} = -0.4$  kJ/mol) , citrate ( $\Delta H_{\text{ion}} = 2.2$  kJ/mol) at pH 4.0 derived from ITC (Figs. S4  
 33 and S5) (sample size = 3).

|                  | $K_d$ ( $\mu\text{M}$ ) | $n$             | $\Delta H$<br>(kJ/mol) | $-T*\Delta S$<br>(kJ/mol) | $\Delta G$<br>(kJ/mol) |
|------------------|-------------------------|-----------------|------------------------|---------------------------|------------------------|
| <i>Bicine</i>    | $0.1 \pm 0.3$           | $10.8 \pm 0.3$  | $-145.7 \pm 3.4$       | $106.5 \pm 3.0$           | $-39.2 \pm 0.6$        |
| <i>Citrate</i>   | $0.3 \pm 0.3$           | $14.0 \pm 0.4$  | $-110.9 \pm 2.8$       | $73.3 \pm 4.7$            | $-37.6 \pm 2.0$        |
| <i>Phosphate</i> | $0.4 \pm 0.3$           | $15.3 \pm 1.7$  | $-73.8 \pm 3.2$        | $36.9 \pm 2.2$            | $-36.9 \pm 2.3$        |
| <i>Oxalate</i>   | $2.2 \pm 1.3$           | $70.8 \pm 17.4$ | $-41.4 \pm 1.6$        | $8.8 \pm 3.0$             | $-32.6 \pm 1.6$        |
| <i>Acetate</i>   | $1.0 \pm 0.2$           | $83.6 \pm 6.9$  | $-28.8 \pm 0.4$        | $-5.3 \pm 0.3$            | $-34.1 \pm 0.4$        |
| <i>Citrate</i>   | $2.4 \pm 1.0$           | $85.6 \pm 3.4$  | $-17.7 \pm 1.1$        | $-14.5 \pm 1.7$           | $-32.2 \pm 1.2$        |

34

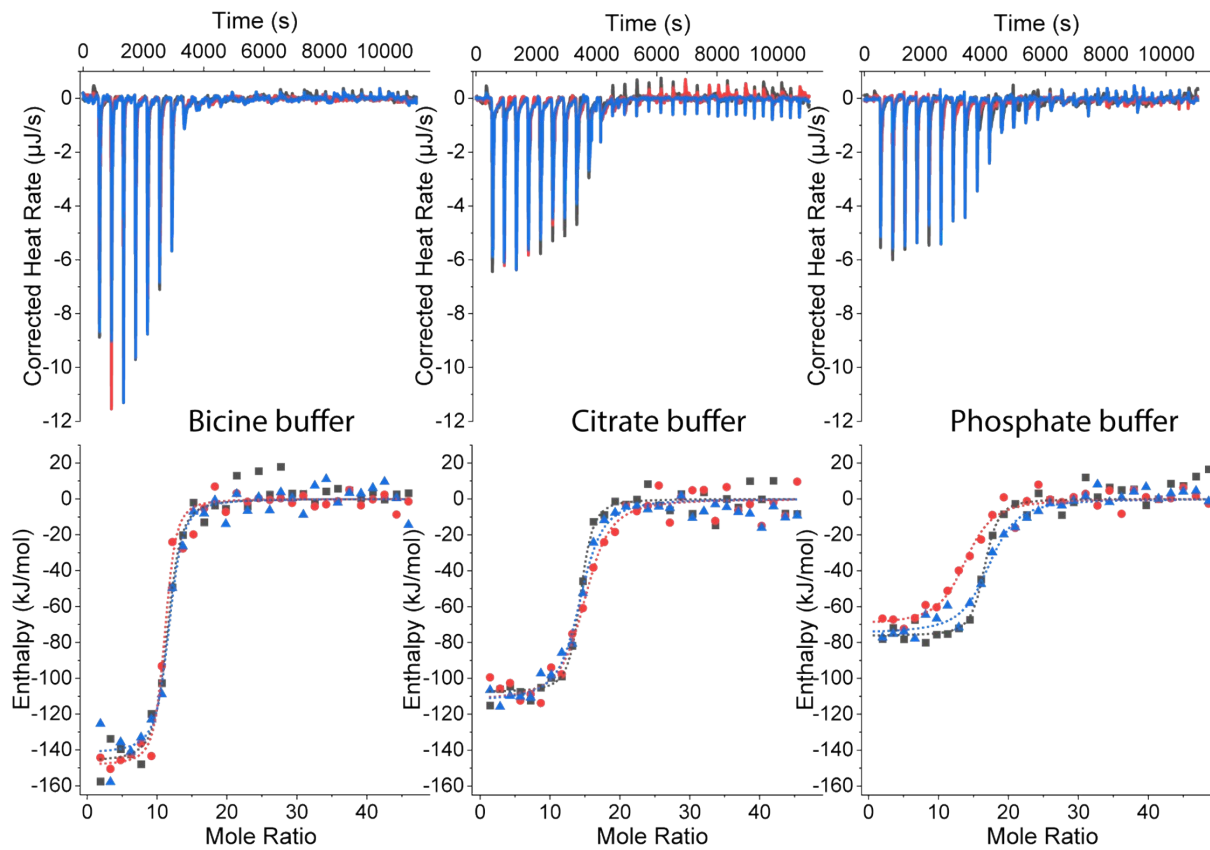

35

36 **Fig. S2.** ITC raw data (lines) and enthalpograms (dots) of alginate  $\beta$ -Lg coacervation with bicine buffer,  
 37 citrate buffer or phosphate buffer, all at pH 2.65 ( $I = 20$  mM). Dotted lines are fitted with an  $n$  equal,  
 38 independent sites model. Each color indicate an individual measurement.

39

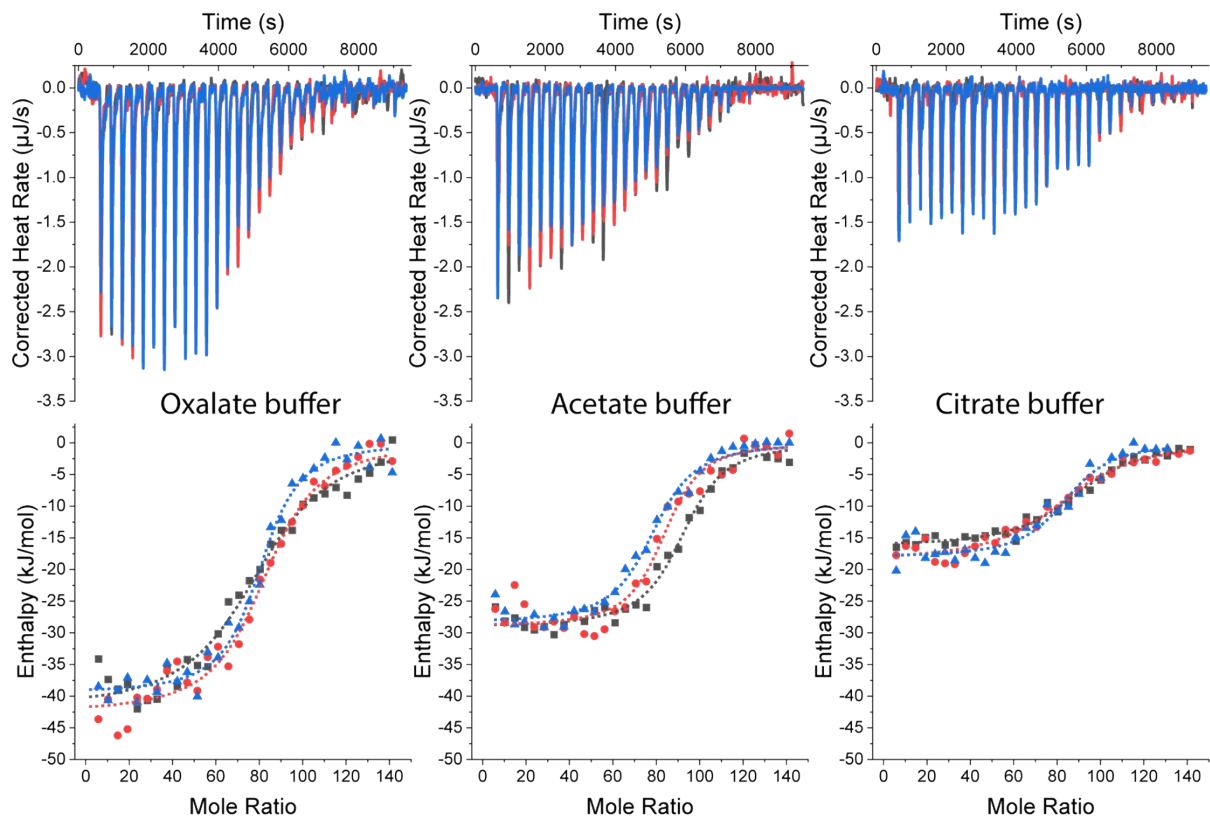

40

41 **Fig. S3.** ITC raw data (lines) and enthalpograms (dots) of alginate  $\beta$ -Lg coacervation with bicine buffer,  
 42 citrate buffer or phosphate buffer, all at pH 4.0 ( $I = 20$  mM). Dotted lines are fitted with an n equal,  
 43 independent sites model. Each color indicate an individual measurement.

44

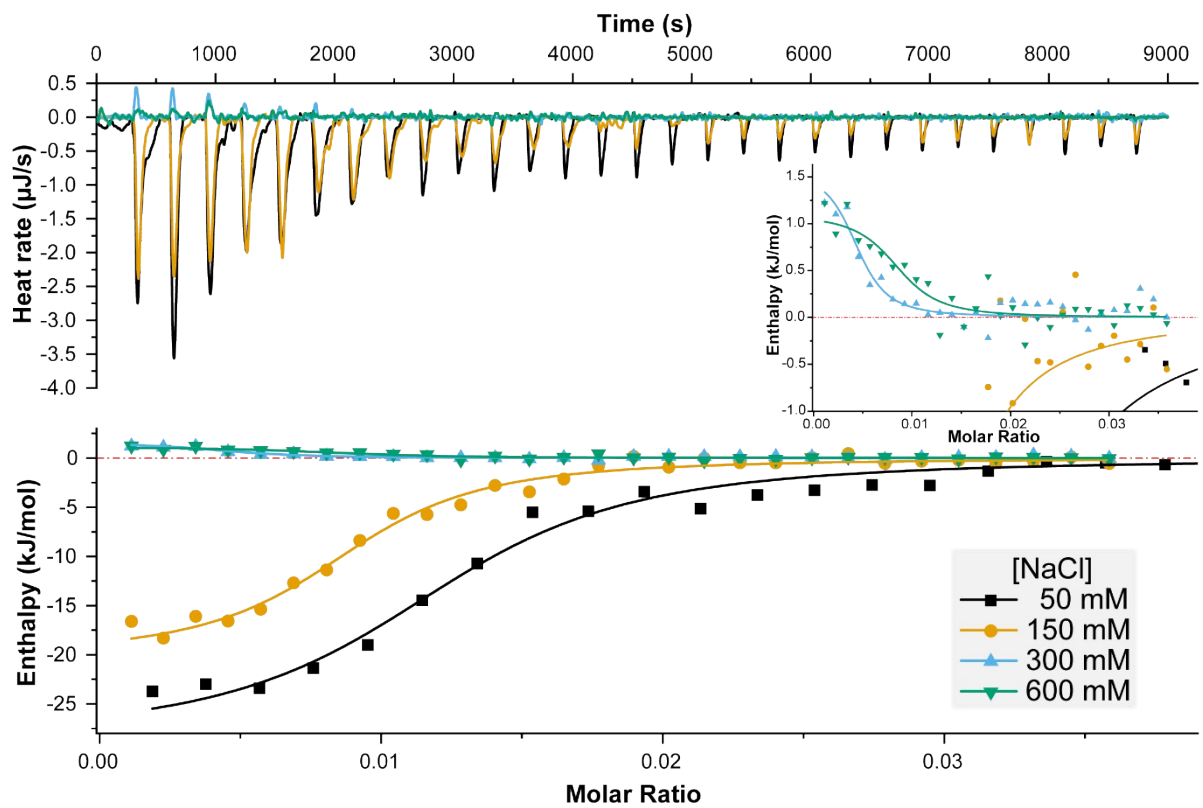

45

46 **Fig. S4** Interactions of 4  $\mu\text{M}$  AlgM (1.4 mg/mL) titrated into 27  $\mu\text{M}$   $\beta\text{-Lg}$  (0.5 mg/mL) measured by ITC  
 47 at pH 4.0 with varying NaCl concentration of 50 mM (yellow), 150 mM (black), 300 mM (blue) and 600  
 48 mM (green). ITC raw data (top) of  $\beta\text{-Lg}$  titrated with AlgM and enthalpograms with model fits (bottom).

49

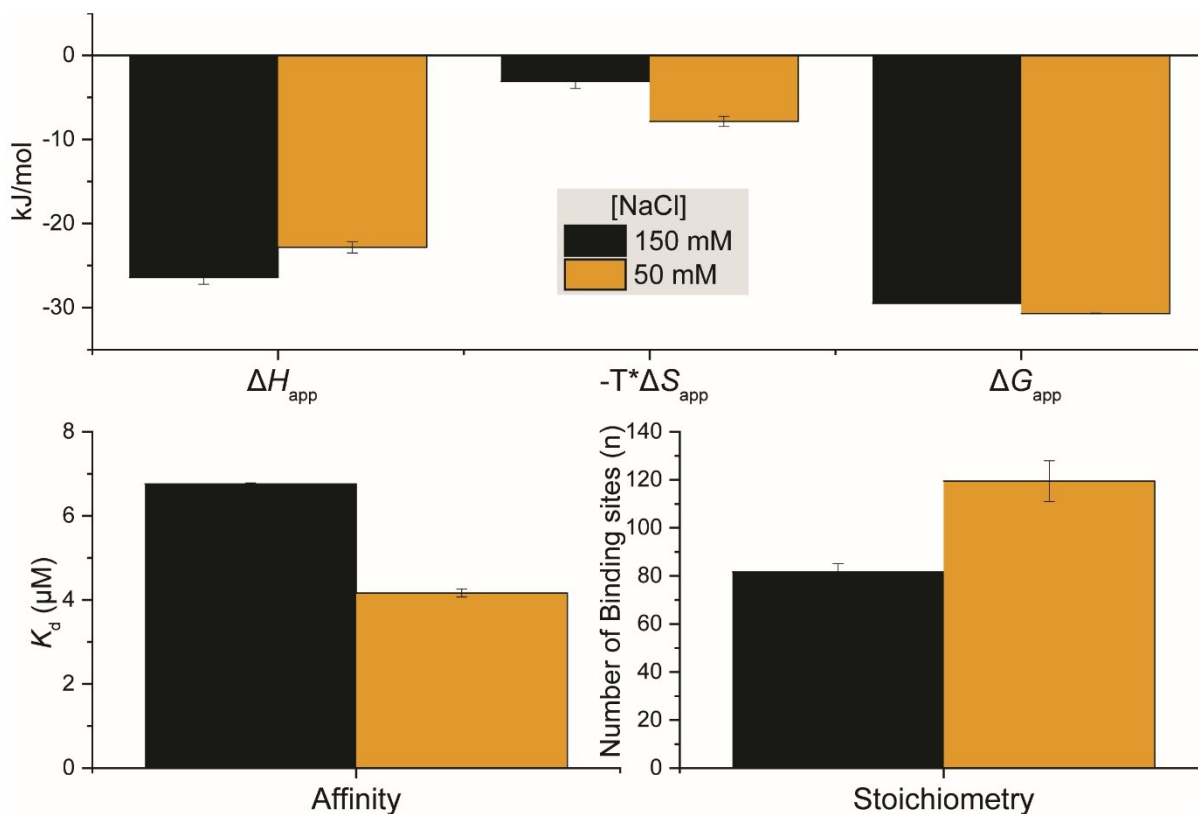

50

51 **Fig. S5.** Binding parameters obtained by fitting ITC thermograms (Fig. 3) with a one site independent  
 52 binding model. All thermodynamic energies as well as affinities are given for  $\beta$ -Lg molecules,  
 53 stoichiometry describes how many  $\beta$ -Lg molecules are bound by one alginate molecule.

54

55 **Table S2.** Binding parameters obtained by fitting ITC thermograms (Fig. S2) with a one site  
 56 independent binding model (sample size = 3).

|                           | 50 mM NaCl | Std. dev. | 150 mM NaCl | Std. dev. |
|---------------------------|------------|-----------|-------------|-----------|
| $K_d$ (M)                 | 5.15E-06   | 0.02E-06  | 5.34E-06    | 0.03E-06  |
| n                         | 125.5      | 7.7       | 79.3        | 5.9       |
| $\Delta H_{app}$ (kJ/mol) | -23.3      | 2.1       | -25.8       | 2.9       |
| $-T\Delta S$ (kJ/mol)     | -6.9       |           | -4.3        |           |
| $\Delta G$ (kJ/mol)       | -30.2      |           | -30.1       |           |

57

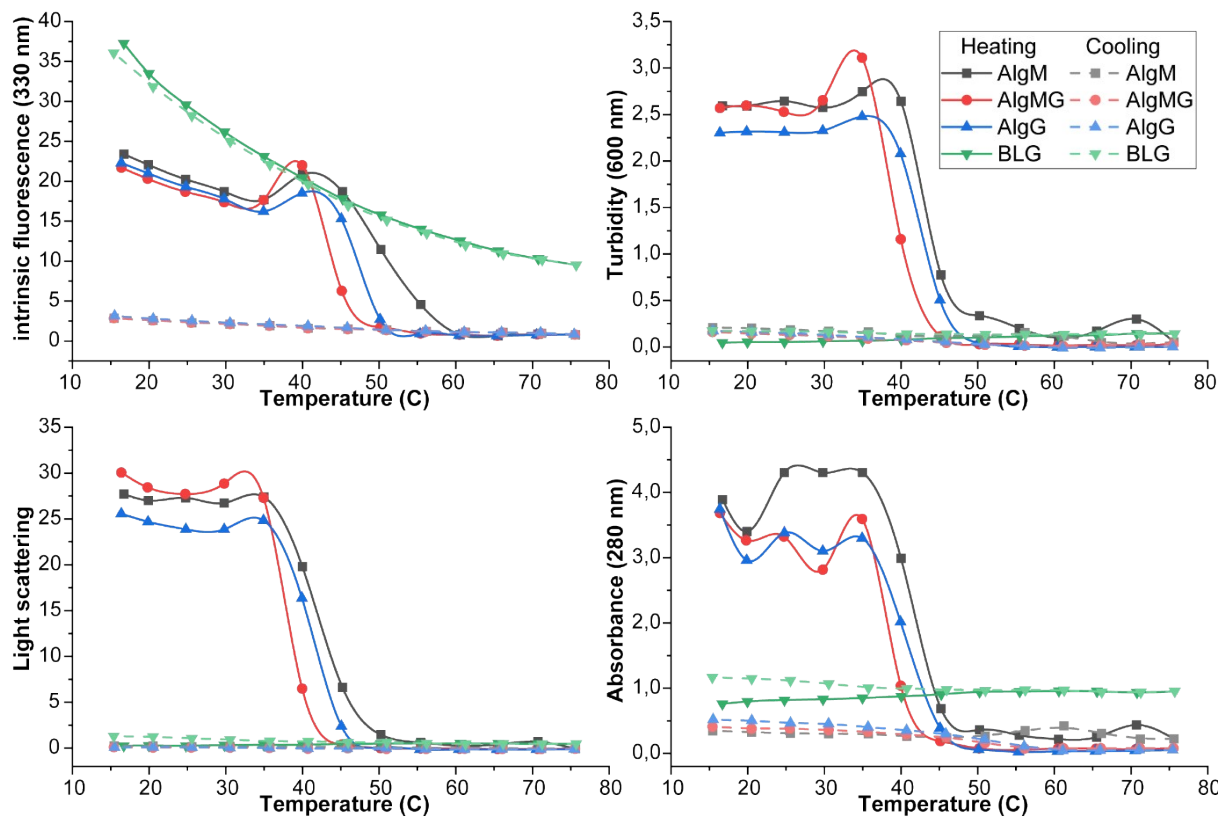

58

59 **Fig. S6.** The effect of heat on  $\beta$ -lactoglobulin alginate complexes was followed by Intrinsic  
60 fluorescence, turbidity, static light scattering and absorbance at 280 nm at pH 4.00.  $\beta$ -Lg (27  $\mu$ M (0.5  
61 mg/mL)), mixed with 0.67  $\mu$ M alginate (0.2–0.3 mg/mL, AlgM (black), AlgMG (red) or AlgG (blue)) or  
62 without (green) was heated from 15 to 75°C (solid lines) and cooled (broken lines) in steps of 5°C.

63

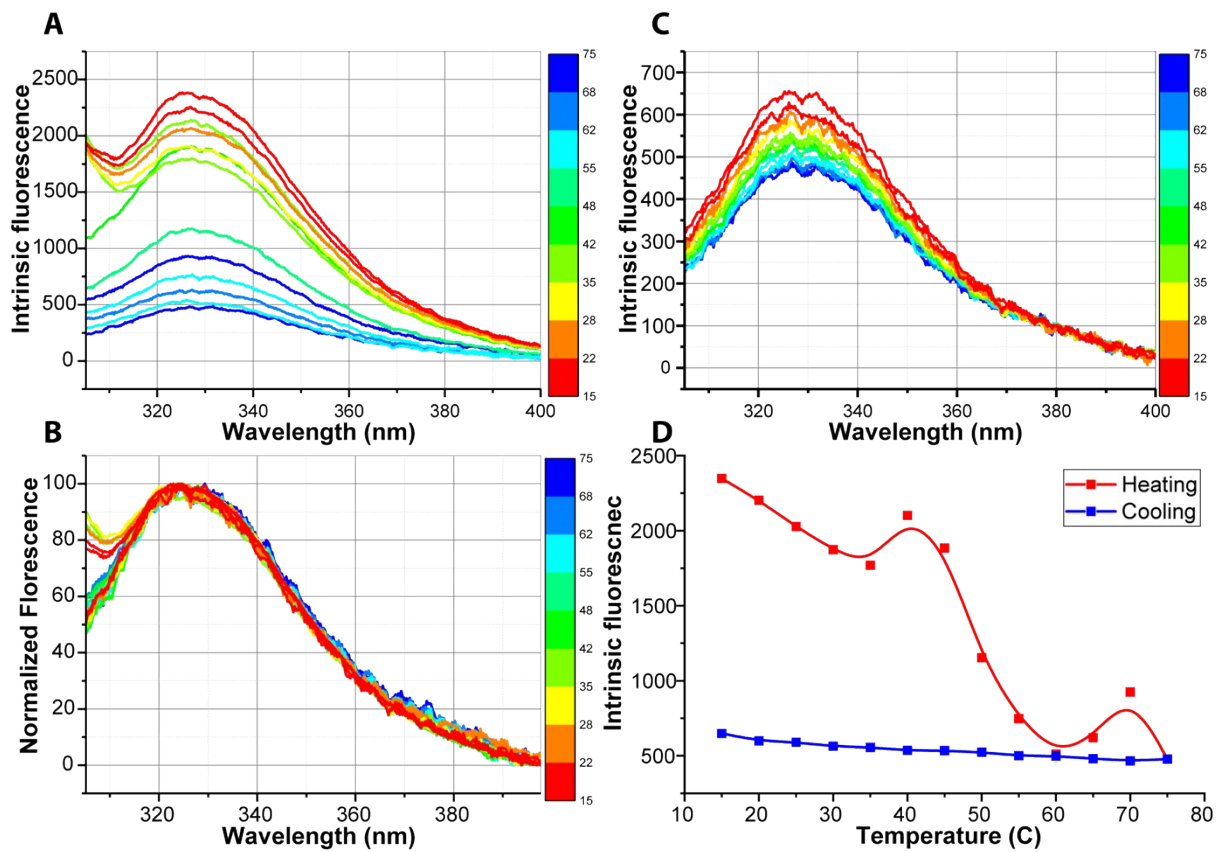

64

65 **Fig. S7.** Intrinsic fluorescence of  $\beta$ -Lg in complex with AlgM at pH 4.00, heated and cooled. A) Intrinsic  
 66 fluorescence spectra during heating 15–75°C. B) Intrinsic fluorescence spectra during cooling 75–15°C.  
 67 C) Normalized intrinsic fluorescence spectra during heating and cooling, overlaid. D) Intrinsic  
 68 fluorescence at 330 nm plotted against increasing (red) and decreasing (blue) temperature.

69



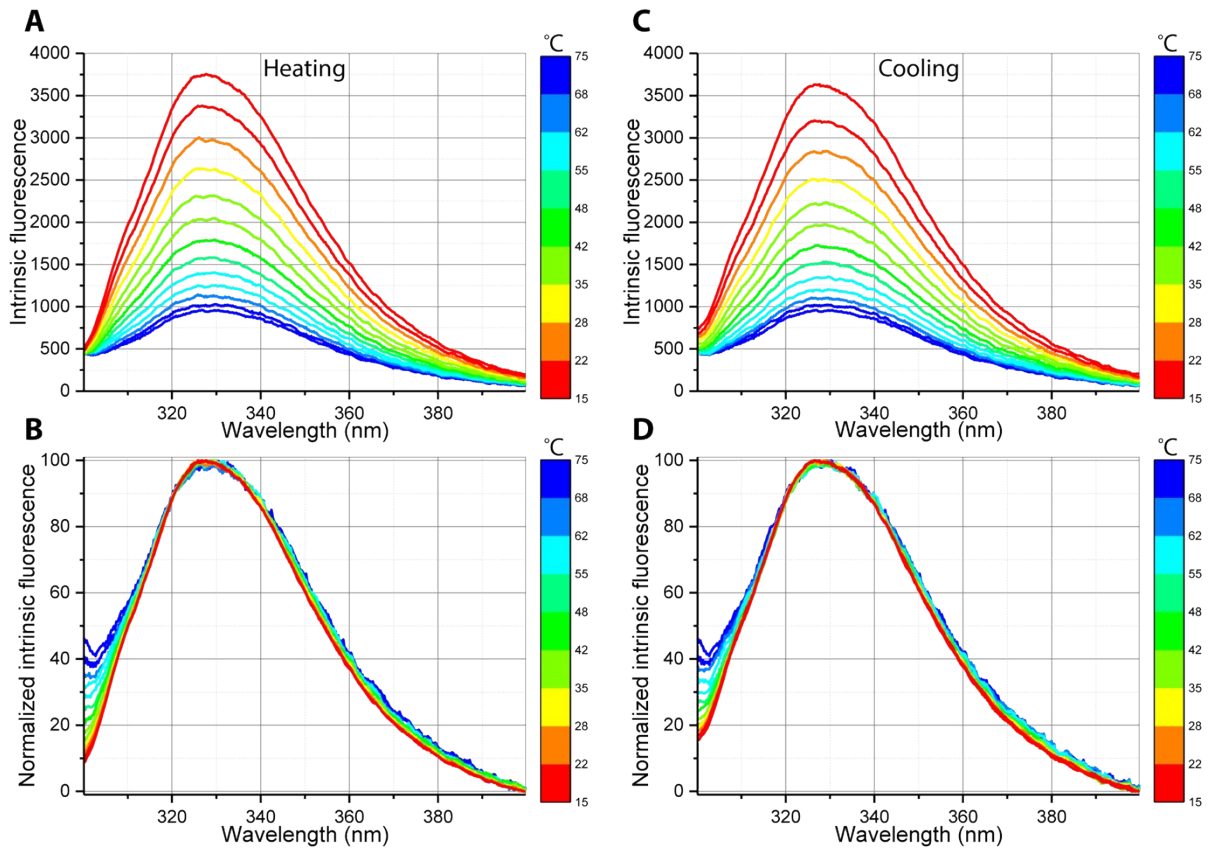

70

71 **Fig. S8.** Intrinsic fluorescence of free  $\beta$ -Lg at pH 4.00, heated and cooled. A) Intrinsic fluorescence  
 72 spectra during heating 15–75 $^{\circ}\text{C}$ . B) Intrinsic fluorescence spectra during cooling 75–15 $^{\circ}\text{C}$ . C)  
 73 Normalized intrinsic fluorescence spectra during heating. D) Normalized intrinsic fluorescence spectra  
 74 during cooling.

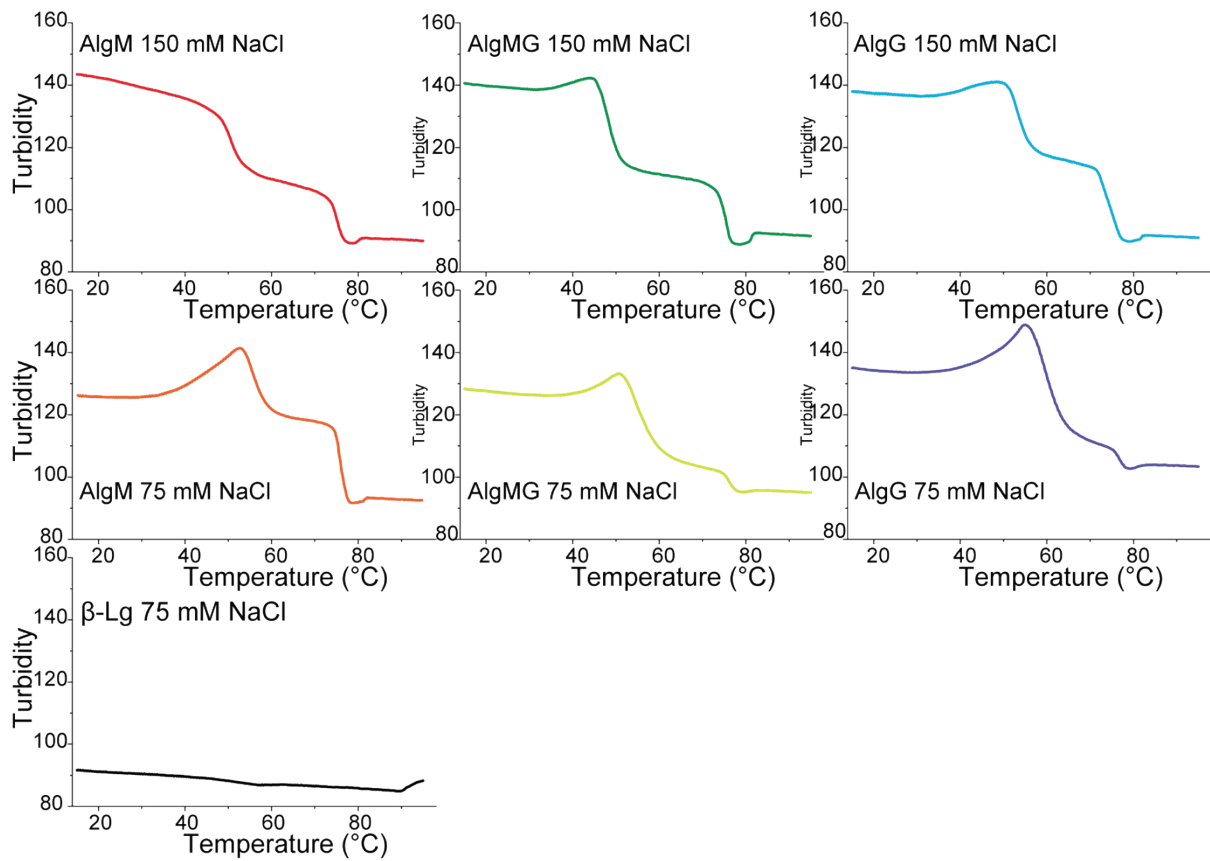

75

76 **Fig. S9** Thermal stability of alginate  $\beta$ -Lg complexes at pH 4.00 measured by turbidity.  $\beta$ -Lg (27  $\mu$ M,  
 77 0.5 mg/mL) mixed with 0.67  $\mu$ M alginate (0.2–0.3 mg/mL at either 75 mM NaCl (orange, olive and  
 78 purple) or 150 mM NaCl (red, green and cyan) and free 27  $\mu$ M (0.5 mg/mL)  $\beta$ -Lg (black)).

79

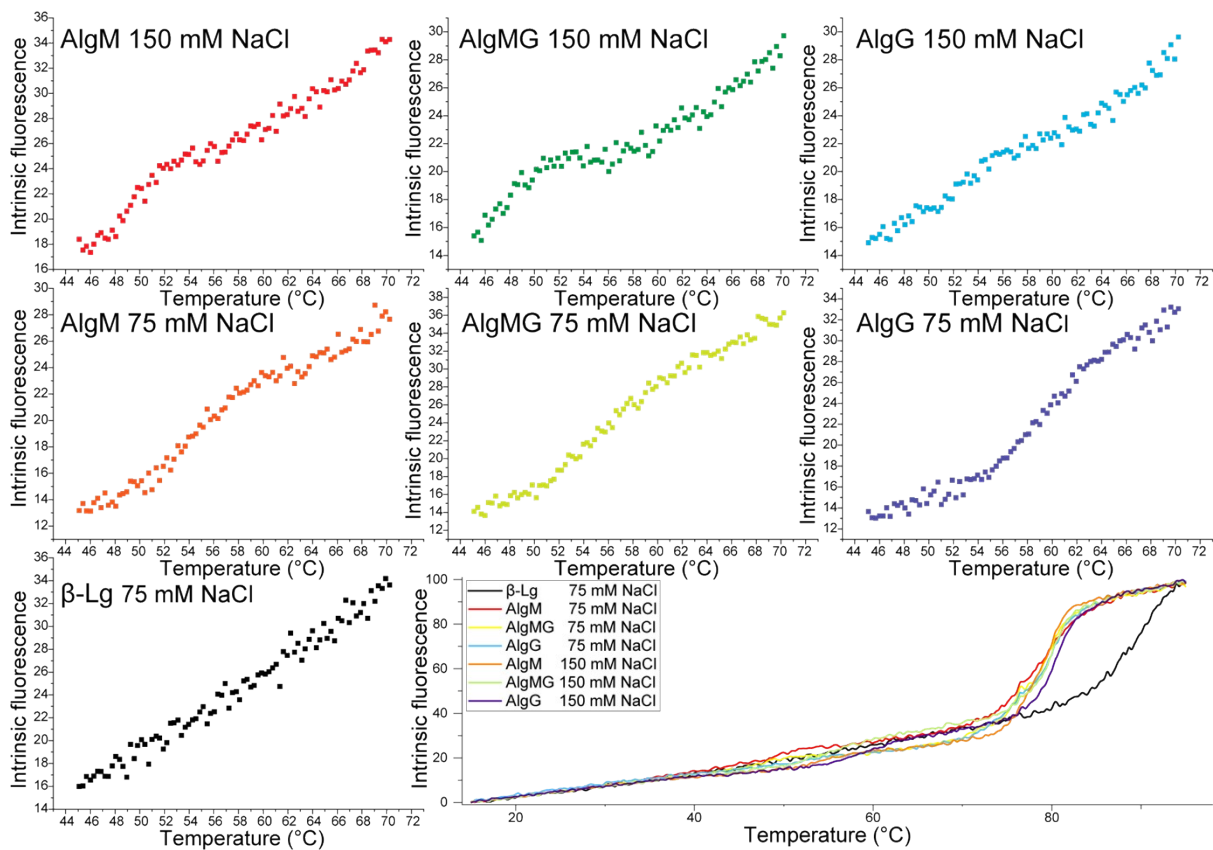

80

81 **Fig. S10.** Thermal stability of alginate  $\beta$ -Lg complexes at pH 4.00 measured by intrinsic fluorescence.  
 82  $\beta$ -Lg (27  $\mu$ M, 0.5 mg/mL) mixed with 0.67  $\mu$ M alginate (0.2–0.3 mg/mL at either 75 mM NaCl or 150  
 83 mM NaCl and free 27  $\mu$ M (0.5 mg/mL)  $\beta$ -Lg. Scatter plots are individual zooms of the temperature  
 84 range 42–72°C.

85

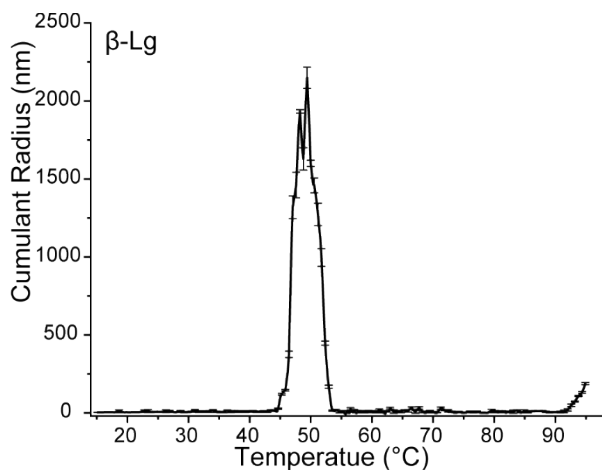

86

87 **Fig. S11.** Cumulant radius of 27  $\mu$ M  $\beta$ -Lg (0.5 mg/mL) at increasing temperature.

88

89 **Table S3.** Melting temperatures determined by JBS Thermofluor fluorescence change (lowest points  
 90 in the  $-d(\text{RFU})/dT$  Fig. S14). n.d. means that a melting temperature could not be determined within the  
 91 temperature range (sample size = 3).

|       | 75 mM NaCl          |        | 150 mM NaCl         |        |
|-------|---------------------|--------|---------------------|--------|
|       | T <sub>m</sub> (°C) |        | T <sub>m</sub> (°C) |        |
| β-Lg  | 89.5                | ± 0.50 | > 95.0*             | ± n.d. |
| AlgM  | 76.0                | ± 0.33 | 77.0                | ± 0.10 |
| AlgMG | 76.0                | ± 0.30 | 77.0                | ± 0.27 |
| AlgG  | 76.0                | ± 0.55 | 77.5                | ± 0.33 |

92

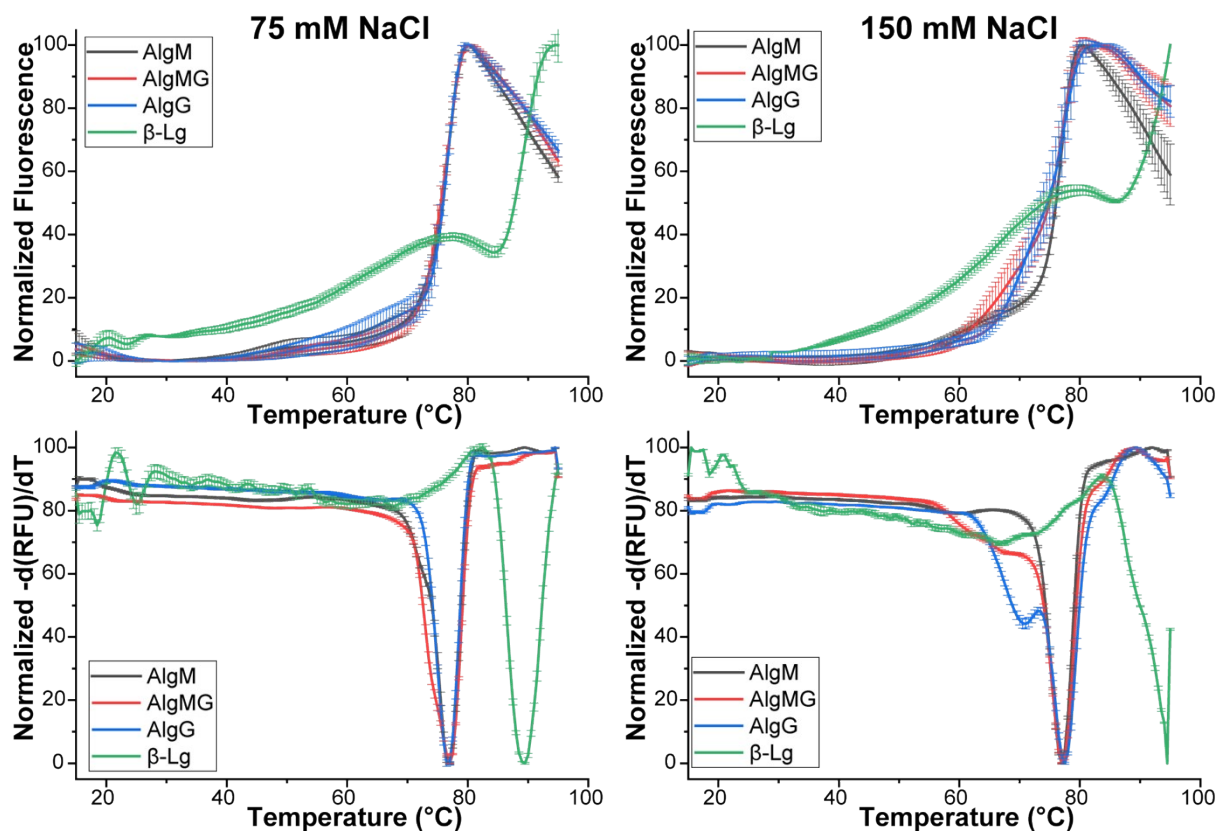

93

94 **Fig. S12.** Hydrophobicity changes at increasing temperature from 15 to 95°C, determined by JBS  
 95 Thermofluor fluorescence. Top panels show normalized fluorescence (580 nm) and bottom panels  
 96 show the first derivative ( $-d(\text{RFU})/dT$ ) of the top panels. Melting temperatures are determined as the  
 97 peaks observed in the first derivative graphs. All samples were measured 6 independent times, lines  
 98 show the mean data and error bars are the resulting standard errors of the means.

99

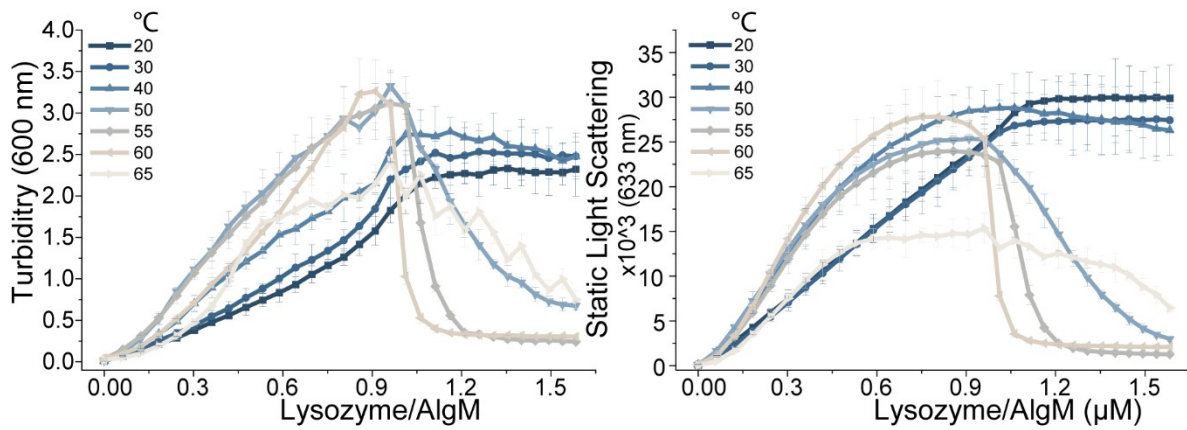

100

101 **Fig. S13** Effect of increasing temperature on alginate lysozyme coacervation at pH 7.0. A) Turbidity  
 102 measured at 600 nm for coacervation from 20 to 65°C. B) Static light scattering measured at 633 nm  
 103 for coacervation from 20 to 65°C.

104

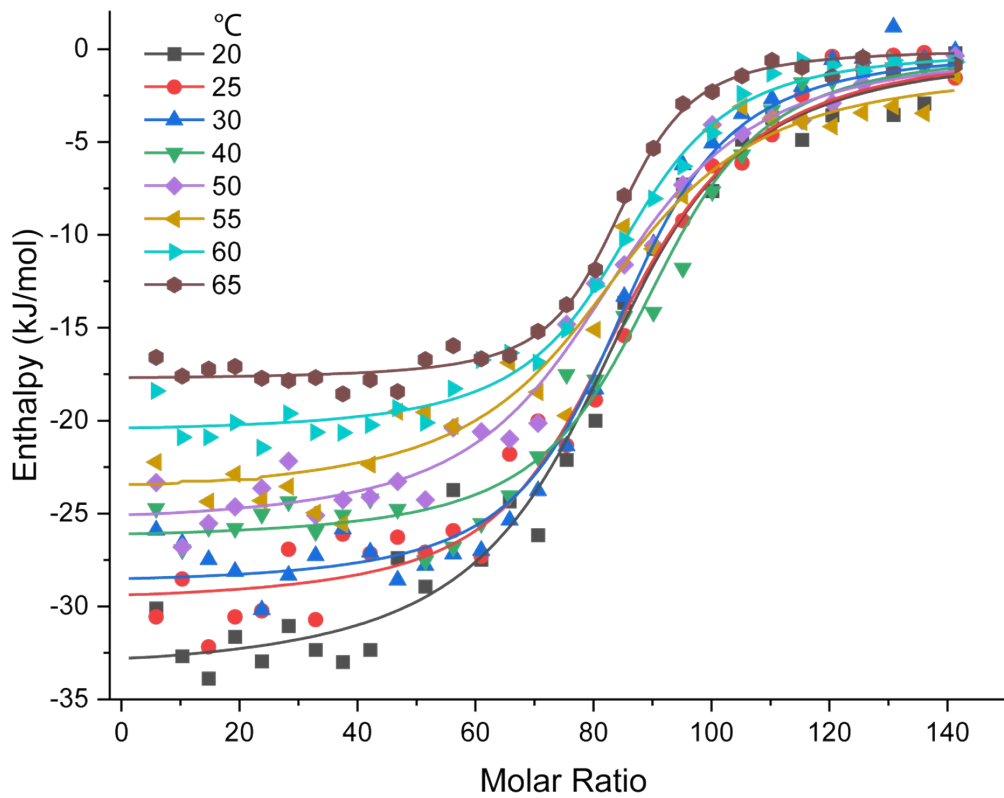

105

106 **Fig. S14.** Averaged enthalpograms (dots) of alginate  $\beta$ -Lg coacervation at 20, 25, 30, 40, 50, 55, 60  
 107 and 65°C. Lines are the averaged fitted n equal, independent sites model for each temperature. Non-  
 108 averaged data are found in Figs. S14 and S15. Molar ratio describes n  $\beta$ -Lg / n alginate.

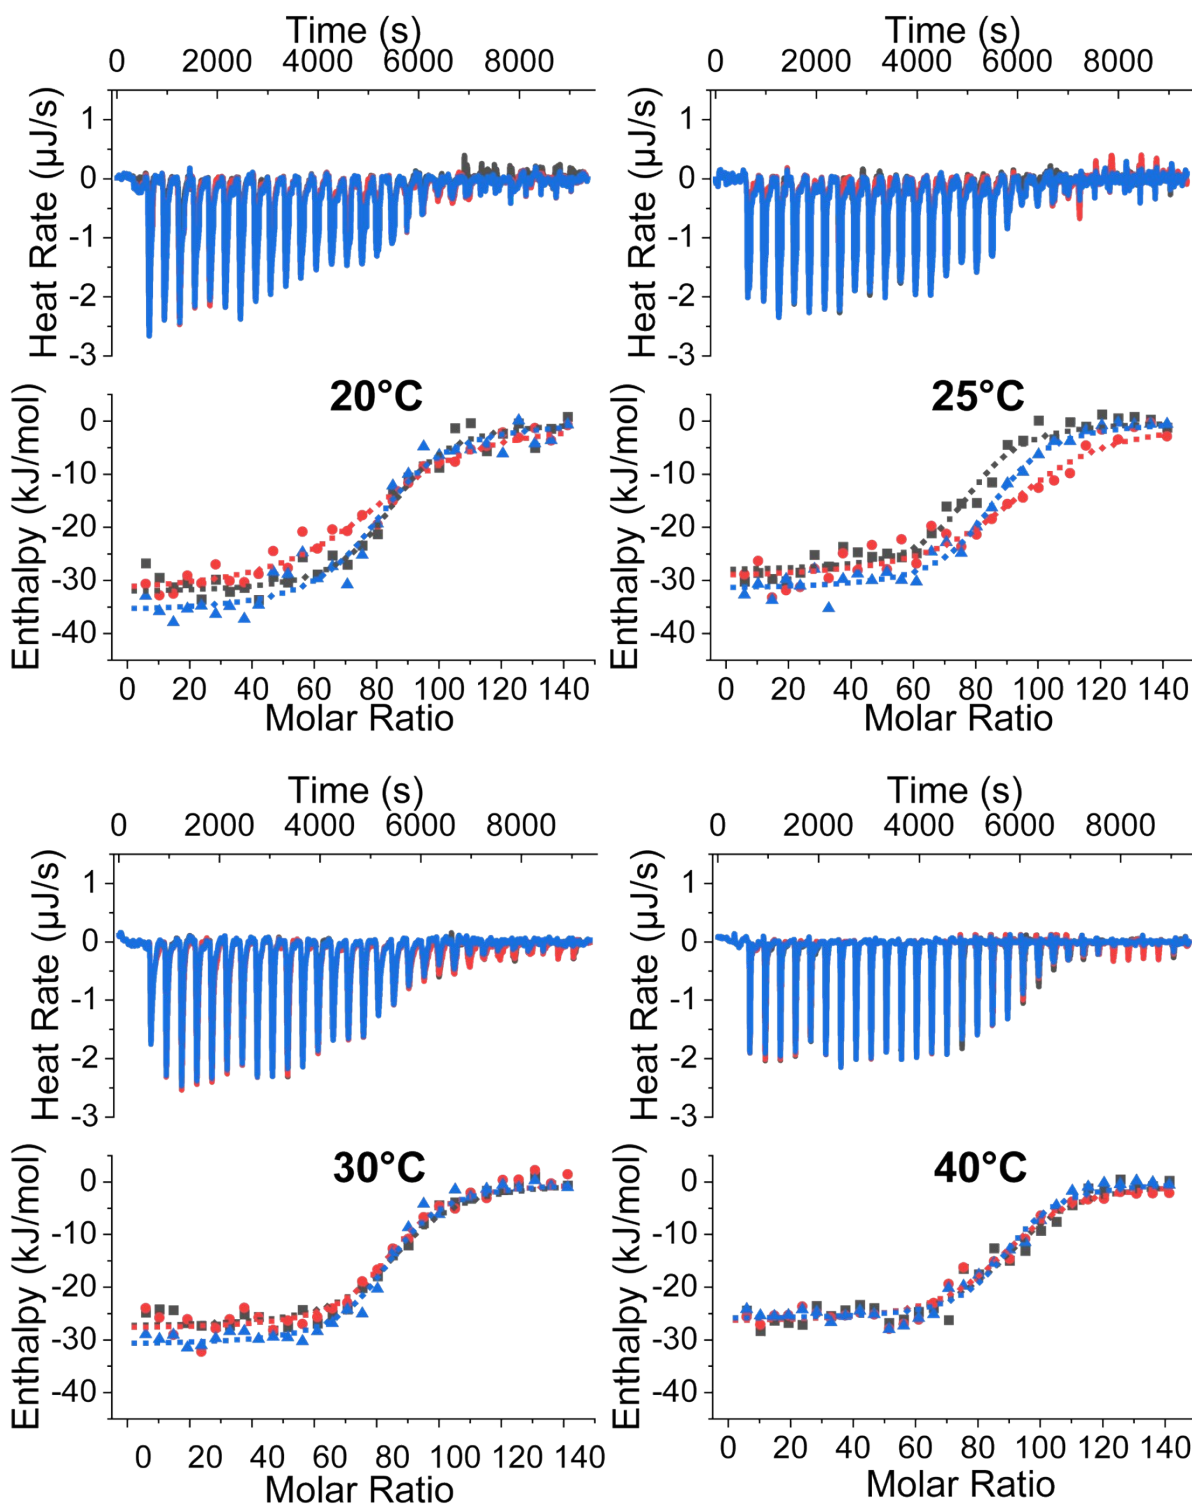

109

110 **Fig. S15.** ITC raw data (lines) and enthalpograms (dots) of alginate  $\beta$ -Lg coacervation at 20, 25, 30  
 111 and 40°C. Dotted lines are fitted with an n equal, independent sites model. Molar ratio describes n  
 112  $\beta$ -Lg /n alginate

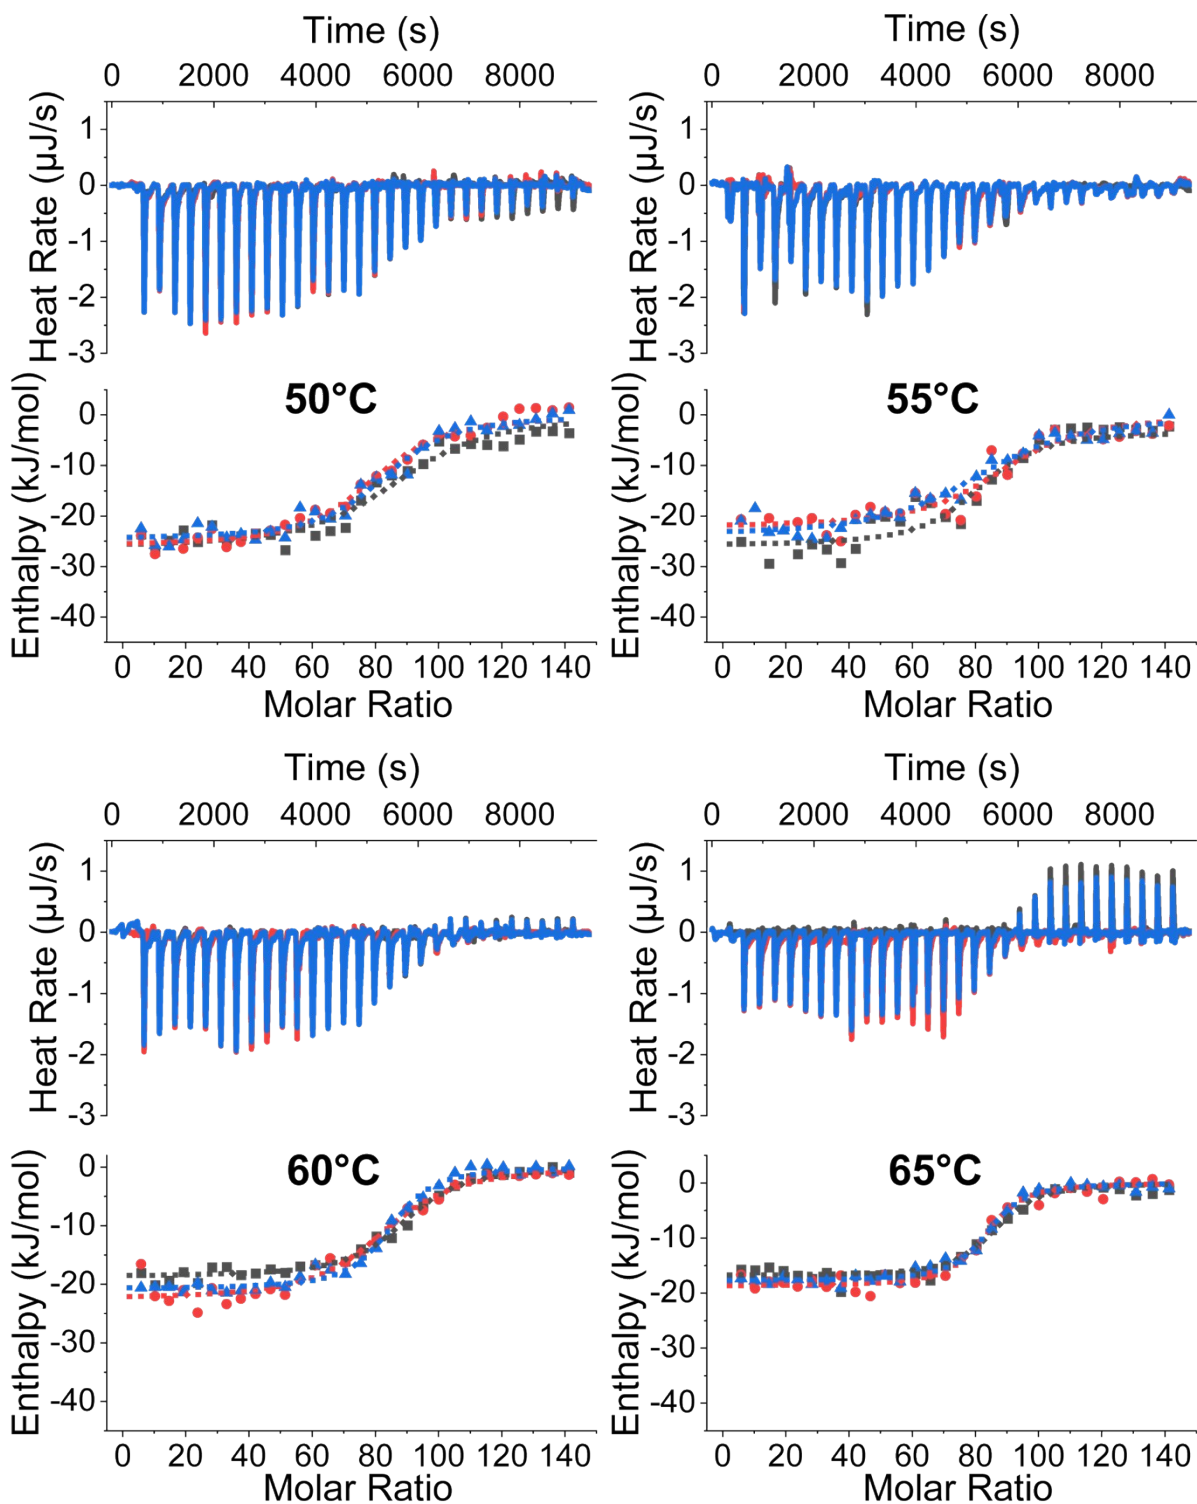

113

114 **Fig. S16.** ITC raw data (lines) and enthalpograms (dots) of alginate  $\beta$ -Lg coacervation at 50, 55, 60  
 115 and 65°C. Dotted lines are fitted with an n equal, independent sites model. Molar ratio describes n  
 116  $\beta$ -Lg /n alginate.



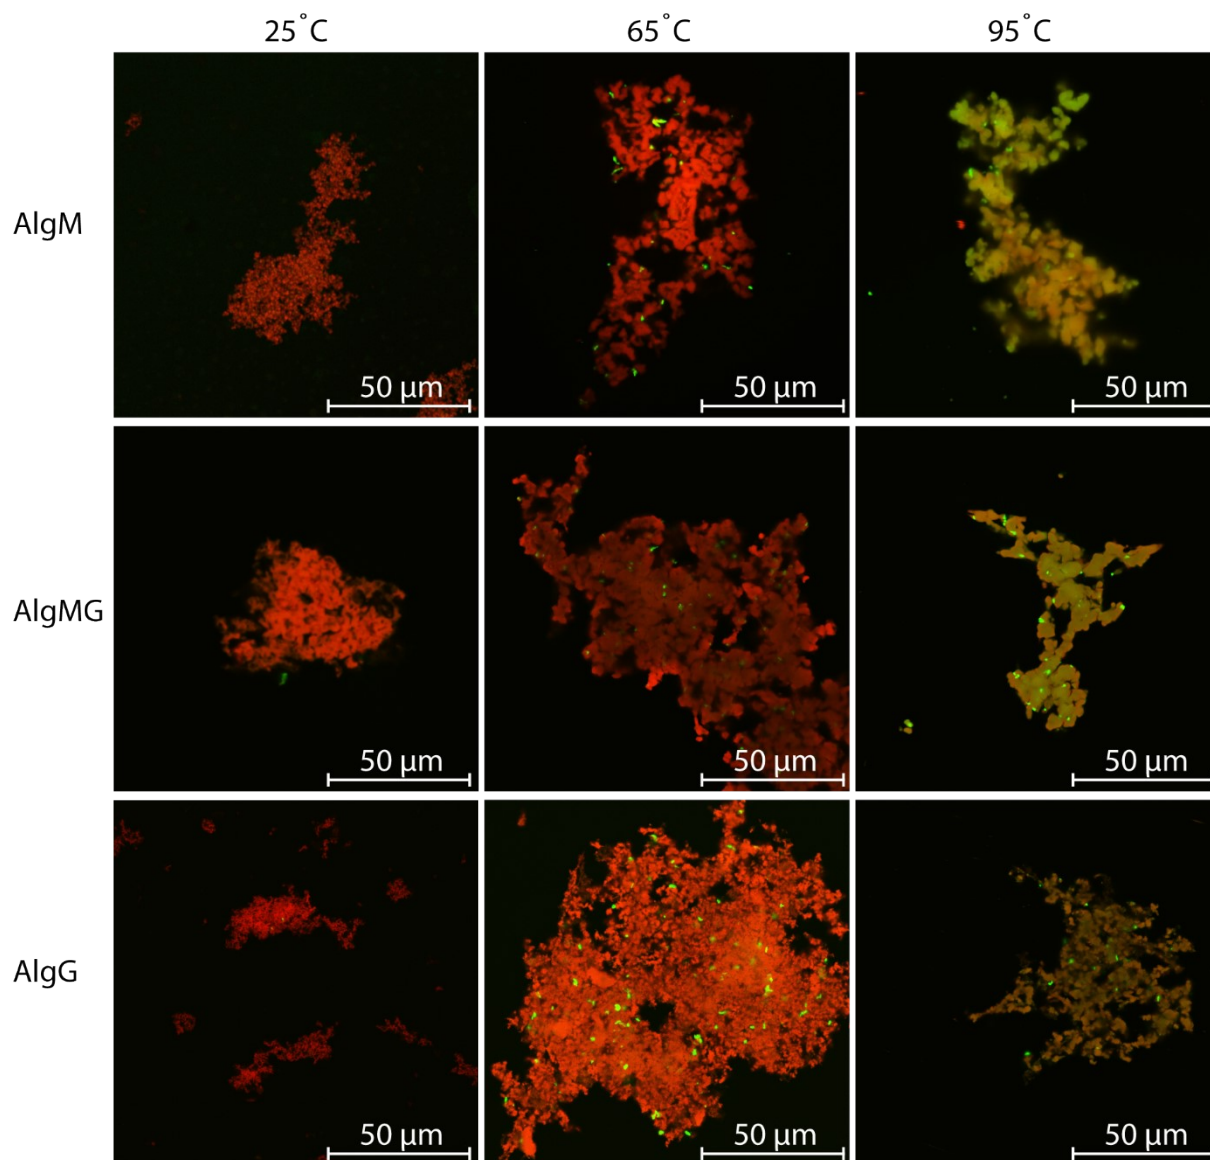

117

118 **Fig. S17** Images of fluorescein labelled alginate in complex with Abberior STAR RED labelled  $\beta$ -Lg at  
 119 pH 4.0,  $I = 15$  mM, heat treated at 25, 65 and 95°C for 5 min. Images were aquired with 100x immersion  
 120 oil objective where complexes were excited at 488 and 630 nm.

121



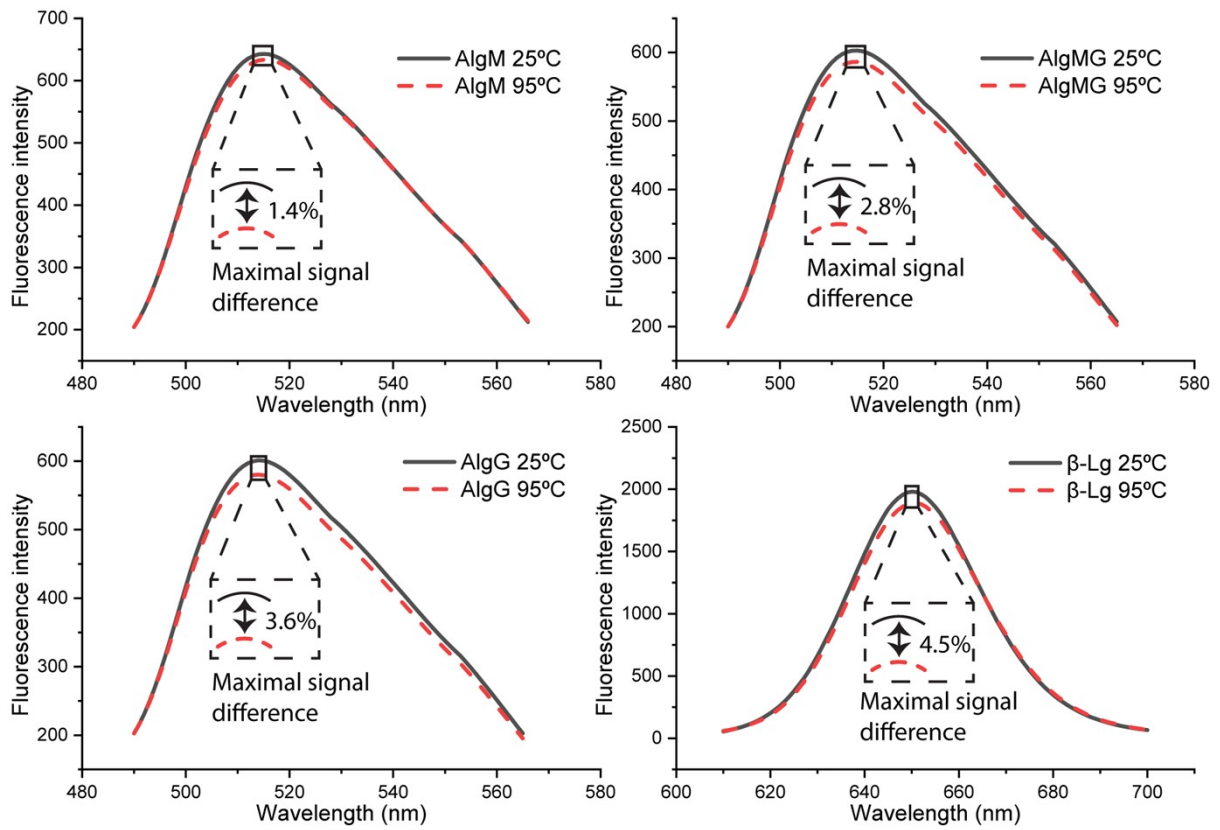

122

123 **Fig. S18.** Fluorescence spectra of AlgM, AlgMG, AlgG and β-Lg, at 25°C or heated to 95°C.

124

125
